# Supplementary material for: Simple sequence repeats in zebra finch (Taeniopygia guttata) expressed sequence tags: a new resource for evolutionary genetic studies of passerines
Source: PubMed Central journal article supplement (PMC1804275; doi:10.1186/1471-2164-8-52), 2007-02-14

### Additional File 3: Predicted location of orthologs of zebra finch EST-SSRs in the chicken genome.

SSRs of different repeat unit length are colour coded: black = dinucleotide, red = trinucleotide, green = tetranucleotide, purple = pentanucleotide. Uninterrupted SSRs are underlined. Positions are in million base pairs (Mbp).

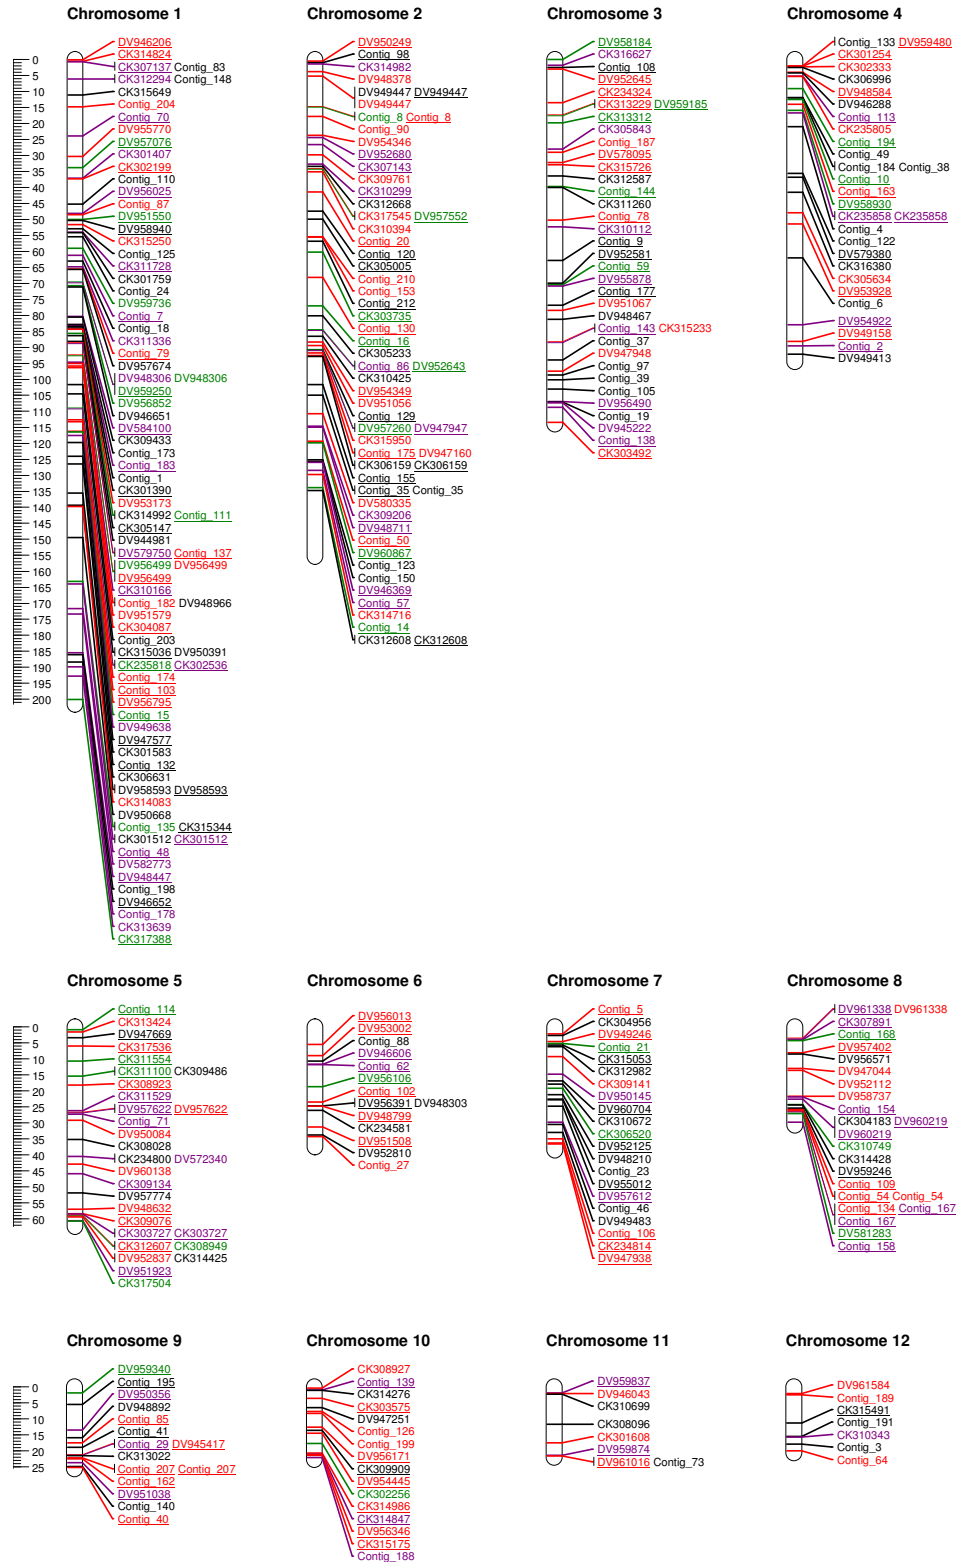

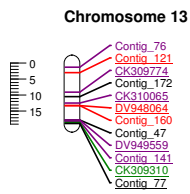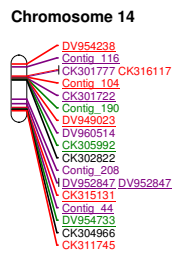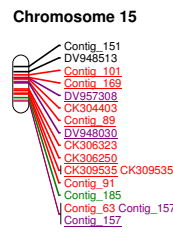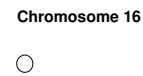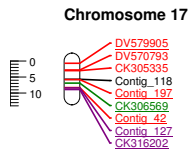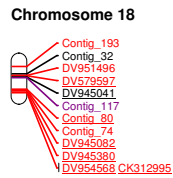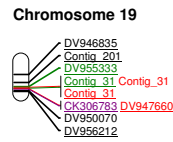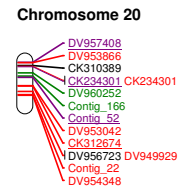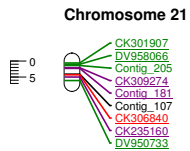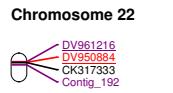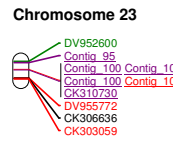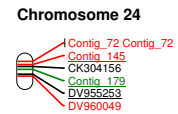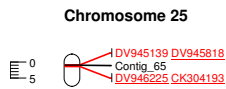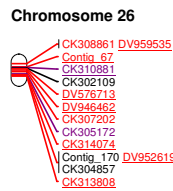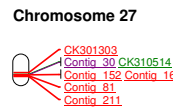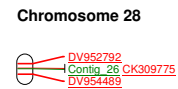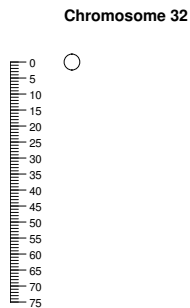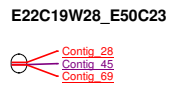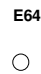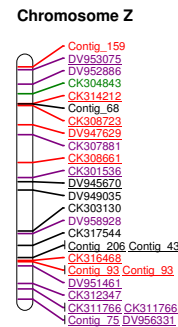

Supplement: 1471-2164-8-52-S3.pdf [file 1471-2164-8-52-S3.pdf]
